# Supplementary material for: A small-scale fractionation pipeline for rapid analysis of seed mucilage characteristics
Source: PubMed Central journal article supplement (PMC7038624; doi:10.1186/s13007-020-00569-6), 2020-02-24
Supplement: 13007_2020_569_MOESM1_ESM.pdf [file 13007_2020_569_MOESM1_ESM.pdf]

**Additional File 1: Table S1.** Monosaccharide summary of *Plantago ovata* mucilage fractionated by the small-scale extraction pipeline in comparison with previously published large scale techniques.

| Fraction                                                 | Marlett & Fischer 2002 <sup>a</sup> | Guo <i>et al.</i> 2008 <sup>b</sup> | Yu <i>et al.</i> 2017 <sup>c</sup> | This study |
|----------------------------------------------------------|-------------------------------------|-------------------------------------|------------------------------------|------------|
| Heteroxylan-Relative Pectin Content (Rha+GalA:Xyl Ratio) |                                     |                                     |                                    |            |
| CWE                                                      | 0.679                               | 0.286                               | 0.426                              | 0.438      |
| HWE                                                      | trace R+G                           |                                     | trace R+G                          | trace R+G  |
| IAE                                                      | -                                   | trace R+G                           | trace R+G                          | trace R+G  |
| Heteroxylan Branching (Ara:Xyl Ratio)                    |                                     |                                     |                                    |            |
| CWE                                                      | 0.200                               | 0.232                               | 0.211                              | 0.222      |
| HWE                                                      | 0.285                               |                                     | 0.301                              | 0.281      |
| IAE                                                      | -                                   | 0.345                               | 0.341                              | 0.364      |

- From the work of Marlett and Fischer, psyllium husk fractions Fr C and Fr B are deemed comparable to CWE and HWE fractions, respectively. Their remaining fraction, Fr A, contained alkali insoluble husk material and thus is not directly comparable to the IAE fraction.
- From Guo *et al.*'s work, psyllium husk fraction WE is deemed to be similar to a pooling of CWE and HWE while AEG 0.5 is deemed comparable to IAE
- From Yu *et al.*'s work CW, HW and KOH fractions are deemed comparable to CWE, HWE and IAE fractions, respectively.
